# Supplementary material
Source: publisher site journal article supplement (https://www.dovepress.com/article/379774)
Supplement: Supplementary file 1 [file get_supplementary_file.php]

Supplementary Material

# Methods

## *Blood collection and processing*

Peripheral blood was obtained from 40 participants (20 participants during a hospitalised exacerbation event and 20 participants with stable COPD) and processed to separate the plasma from the blood cell fraction. Briefly, peripheral blood was drawn into x2-5 BD vacutainer K2 EDTA plus blood collection tubes (maximum volume for x1 tube = 4mL). Blood fractionation was performed by differential centrifugation, firstly by centrifuging the whole blood at 1200xg for 10 min at room temperature. This was followed by the plasma supernatant then being centrifuged at 1600xg for 10 min at room temperature in order to remove apoptotic bodies, cellular fragments and circulating tumour cells (1). The plasma supernatant was then centrifuged at 20,000xg for 40min at 4˚C in order to deplete larger microvesicles. The remaining larger microvesicle-depleted plasma supernatant was then bio-banked and stored at -80˚C until further downstream EV isolation.

## Characterisation of plasma extracellular vesicles

### Transmission electron microscopy

Re-suspended plasma EVs in 1X PBS were visualised using a Tecnai G2 F30 transmission electron microscope, Cs=2mm (ThermoFisher Scientific, USA). Briefly, TEM sample carriers were glow discharged for 1 min at 30% power prior to use. For each sample a succession of 25µL droplets were placed on Parafilm consisting of 1 droplet sample solution, 3X PBS, 3X ultrapure water and one 1X Uranyl acetate (UA, 2% w/w in H2O). With the glow discharged side facing down, an EM sample carrier was first placed on the sample droplet for 30 seconds, followed by 3X PBS, 3X ultrapure water and finally on 1X UA. In each step the sample was incubated for 30 seconds. After the last incubation the excess UA was blotted away with filter paper. The sample carrier was left to dry for 10 minutes, the grids were then ready for examination with the TEM. For the examination the microscope was operated at 300kV with the following apertures inserted: Condenser C2 – 150uM; Objective – 100uM. For imaging, using the Imaging OneView 4k x 4k CMOS camera, the drift correction function using GMS 3.0 acquisition software (Gatan Inc, [www.gatan.com](http://www.gatan.com)) was activated. Calibrated scale bars were embedded in the final images.

### Western blot of EV markers

Protein concentration of re-suspended EVs in 1X PBS was assessed using the Pierce BCA Protein Assay Kit (ThermoFisher Scientific, USA) as per the manufacturer’s instructions. Reconstituted lyophilized exosome standard from human plasma (HansaBiomed, Estonia) was used as a positive control. 10µg of re-suspended EVs were then prepared in Bolt LDS sample buffer (ThermoFisher Scientific, USA) under reducing conditions and boiled for 5 mins at 95˚C, followed by 10 minutes on ice. Proteins were separated by SDS-PAGE (SDS-polyacrylamide gel electrophoresis) and transferred onto polyvinylidene difluoride (PVDF) membranes, blocked in 5% non-fat powdered milk in Tris buffered saline and 0.5%Tween-20 (TBS-T) and then probed with antibodies. Primary antibodies included human Albumin, Flotillin-1, diluted 1:1000 (Cell Signalling Technology, 4929, 18634 respectively) and anti-CD9, diluted 1:2000 (Abcam, EPR2949). Proteins of interest were detected with 1:10,000 diluted Goat anti-Rabbit HRP-conjugated IgG (H+L) antibody in TBS-T (Invitrogen, USA) and visualized with SuperSignal West Pico PLUS Chemiluminescent Substrate (ThermoFisher Scientific, USA) using the auto-detect settings on the ImageQuant™ LAS 4000 system (GE Healthcare).

## Isolation and RNA extraction of plasma extracellular vesicles

### EV isolation

Frozen plasma samples were thawed and isolated for EVs using the commercially available miRCURY Exosome Serum/Plasma Kit (QIAGEN, Hilden, Germany) according to the manufacturer’s instructions. Briefly, 600µL of thawed plasma was incubated with thrombin for defibrination, followed by EV precipitation with 500µL of the thrombin treated plasma and 0.4 volumes of Precipitation Buffer A. Samples were then incubated at 4˚C for 1 hour and then centrifuged at 500xg for 5 min at 20˚C. The supernatant was then separated and the remaining EV pellet was either re-suspended in 200µL 1X PBS, and stored at -80 for downstream characterisation, or re-suspended in 700µL QIAZOL as per the manufacturers protocol for RNA purification using the miRNeasy Mini Kit (QIAGEN, Hilden, Germany).

### EV RNA purification

Total RNA was extracted using the miRNeasy Mini Kit (QIAGEN, Hilden, Germany) from the 700µL QIAZOL re-suspended pelleted EVs from the initial 500µL of thrombin pre-treated plasma. To improve RNA yield and reproducibility between samples, 1.25µg/mL of MS2 bacteriophage carrier RNA (Roche Diagnostics GmbH, Mannheim, Germany) was added along with the recommended synthetic RNA spike-ins (UniSp2, UniSp4, UniSp5 – control for RNA isolation efficiency, as per the manufactures protocol, QIAGEN, Hilden, Germany) during the QIAZOL re-suspension of the EV pellet. Total RNA was extracted using the QIACube and eluted with 50µL of ribonuclease-free water, then stored at -80˚C prior to miRNA profiling.

### Quantitative PCR using miRCURY LNA Serum/Plasma Focus PCR Panels

Samples from the RT reaction were prepared with the miRCURY SYBR Green PCR Kit (QIAGEN, Hilden, Germany) and assessed for miRNA gene expression using the miRCURY LNA miRNA Serum/Plasma Focus PCR Panels (QIAGEN, Hilden, Germany) in a 384 well format, which detects 179 of the most expressed miRNAs in human plasma. Amplification was performed using the ViiA 7 real time PCR system (Applied Biosystems) with a low concentration of ROX reference dye (20X concentration) as per the manufactures protocol. Results reported as Ct values were obtained using the QuantStudio v6 software, with the raw Ct values being exported into an Excel file and uploaded onto the Qiagen data analysis web portal at http://www.giagen.com/geneglobe.

GeneGlobe was utilised for analysis of internal amplification controls, calibration of raw Ct data for plate-to-plate variations using the interplate calibration controls (UniSp3 IPC), haemolysis testing and setting Ct cut-off values, which only miRNAs with a Ct <40 were considered for analysis. Samples were assigned to a Control Group or Test Group.

The first analysis compared the exacerbation cohort (test cohort n=20) to the stable state cohort (control cohort n=20). The second analysis compared participants categorised by GOLD stages (control cohort= GOLD 2, n=9; test cohort = GOLD 3 and GOLD 4, n=22). For the first analysis the Ct values were normalised based on the NormFinder algorithm supplied by the GeneGlobe software (1-3). Optimum reference miRNAs identified included miR-106b-5p, miR-185-5p, miR-152-3p, miR-30d-5p, let-7i-5p, miR-19a-3p, miR-92a-3p, miR-320d, let-7g-5p and miR-19b-3p.

For the second analysis the Ct values were normalised based on the geNorm algorithm of the entire miRNA panel, performed by the GeneGlobe software (4). The optimum reference miRNAs for the second analysis included let-7f-5p, miR-486-5p, miR-451a, miR-25a-3p, miR-16-5p, miR-421, miR-19a-3p, miR-92a-3p, miR-19b-3p and miR-21-5p.

Fold change/ regulation were calculated using the web portal using the ΔΔCt method, where the ΔCt is calculated between the miRNA of interest and an average of reference miRNAs, followed by ΔΔCt calculations (ΔCt (Test Group) – Δ Ct (Control Group)). Fold change was then calculated using 2^ (- ΔΔCt) formula.

### miRNA Function Enrichment Analysis

GeneGlobe used TargetScan software to identify candidate miRNA-regulated genes that were attributed to the observed changes in expression in patient samples from the test group versus control group. Further Kyoto Encyclopaedia of Genes and Genomes (KEGG) pathway analysis was performed using the online software DIANA-mirPath v.3.0, with identified miRNA targets searched also using TargetScan (8). Results were merged by a “gene union” or “pathway union” criterion with significance calculated by the DIANA software using p-value threshold <0.05, TargetScan Score Type of Context + (-0.4) or a TargetScan Conservation Score (0.1) and a Fisher’s Exact Test being the statistical test for the enrichment analysis.

### Statistical analyses

All statistical analyses were performed by using GeneGlobe (http://www.giagen.com/geneglobe), DIANA-miRPath v.3.0 (6) and Statistical Package for Social Science (SPSS V.27.0) (IBM, NY, USA). A p-value of <0.05 (two-tailed) was statistically significant.

Relative miRNA expression was assessed for normality using the Shapiro-Wilk test. The significance of the identified miRNAs with a fold regulation/ fold change >1.5 was assessed using either an independent t-test (normally distributed data) or Mann-Whitney U test (non-normally distributed data). Fold-change values greater than one indicates a positive- or an up-regulation, and the fold-regulation is equal to the fold-change. Fold-change values less than one indicate a negative or down-regulation, and the fold-regulation is the negative inverse of the fold-change.

The differences in clinical characteristics between patient cohorts was analysed by Chi square test for categorical variables or depending on normal distribution of the data, an independent t-test (normal distribution) or Mann-Whitney U test (non-normal distribution) for continuous variables. Spearman Rank correlation analysis was performed between clinical characteristics and miRNA relative expression (ΔCt values).

For the significantly dysregulated miRNAs identified in plasma EVs in exacerbation participants compared to stable state, receiver operating characteristic (ROC) curves and area under the curve (AUC) values with 95% confidence intervals (CIs) were calculated to determine the diagnostic potential these miRNAs have in discriminating between both groups. A multivariate logistic regression model was established with combinations of suitable miRNAs and appropriate clinical characteristics, which was then used to evaluate the association of differentially expressed miRNAs. If miRNA combinations included both over- and under-expressed targets, under-expressed miRNAs ΔCt values were multiplied with -1 for input into the logistic regression model analysis.

# Supplementary Figures and Tables

## Tables

**Table S1.** Correlation analysis between clinical characteristics and identified significantly dysregulated EV miRNAs for exacerbating COPD participants compared to participants at stable state

|  | | Age | Pack years | FEV1 | FVC | FEV1/FVC | FEV1%Pred | CRP | Fibrinogen | CAT | hsa-miR-92b-3p | hsa-miR-223-3p | hsa-miR-374a-5p | hsa-miR-106b-3p | hsa-miR-34a-5p |
| --- | --- | --- | --- | --- | --- | --- | --- | --- | --- | --- | --- | --- | --- | --- | --- |
| Age | Correlation Coefficient | 1.000 | .421* | -0.075 | -0.084 | 0.063 | 0.168 | -0.009 | -0.047 | -0.142 | 0.221 | -0.140 | 0.000 | -0.256 | -0.281 |
| Sig. (2-tailed) |  | 0.010 | 0.673 | 0.636 | 0.721 | 0.343 | 0.956 | 0.780 | 0.394 | 0.170 | 0.389 | 0.998 | 0.110 | 0.079 |
| N | 40 | 36 | 34 | 34 | 34 | 34 | 39 | 38 | 38 | 40 | 40 | 40 | 40 | 40 |
| Pack years | Correlation Coefficient | .421* | 1.000 | .368* | 0.302 | 0.254 | 0.284 | -0.151 | -0.110 | -0.176 | -0.167 | -0.239 | -0.066 | -.341* | -0.296 |
| Sig. (2-tailed) | 0.010 |  | 0.046 | 0.105 | 0.175 | 0.128 | 0.387 | 0.535 | 0.312 | 0.331 | 0.160 | 0.701 | 0.042 | 0.080 |
| N | 36 | 36 | 30 | 30 | 30 | 30 | 35 | 34 | 35 | 36 | 36 | 36 | 36 | 36 |
| FEV1 | Correlation Coefficient | -0.075 | .368* | 1.000 | .584** | .743** | .865** | -.388* | -.382* | -.419* | -0.274 | -.359* | -.351* | -0.162 | -.369* |
| Sig. (2-tailed) | 0.673 | 0.046 |  | 0.000 | 0.000 | 0.000 | 0.025 | 0.031 | 0.017 | 0.117 | 0.037 | 0.042 | 0.359 | 0.032 |
| N | 34 | 30 | 34 | 34 | 34 | 34 | 33 | 32 | 32 | 34 | 34 | 34 | 34 | 34 |
| FVC | Correlation Coefficient | -0.084 | 0.302 | .584** | 1.000 | -0.042 | 0.267 | -.436* | -.410* | -.483** | -.419* | -.437** | -0.233 | -0.174 | -0.227 |
| Sig. (2-tailed) | 0.636 | 0.105 | 0.000 |  | 0.813 | 0.127 | 0.011 | 0.020 | 0.005 | 0.014 | 0.010 | 0.184 | 0.326 | 0.197 |
| N | 34 | 30 | 34 | 34 | 34 | 34 | 33 | 32 | 32 | 34 | 34 | 34 | 34 | 34 |
| FEV1/FVC | Correlation Coefficient | 0.063 | 0.254 | .743** | -0.042 | 1.000 | .856** | -0.046 | -0.107 | -0.091 | -0.014 | -0.084 | -0.189 | -0.038 | -0.325 |
| Sig. (2-tailed) | 0.721 | 0.175 | 0.000 | 0.813 |  | 0.000 | 0.797 | 0.562 | 0.619 | 0.936 | 0.637 | 0.283 | 0.830 | 0.061 |
| N | 34 | 30 | 34 | 34 | 34 | 34 | 33 | 32 | 32 | 34 | 34 | 34 | 34 | 34 |
| FEV1%Pred | Correlation Coefficient | 0.168 | 0.284 | .865** | 0.267 | .856** | 1.000 | -0.272 | -0.219 | -.366* | -0.023 | -0.144 | -0.243 | -0.119 | -0.317 |
| Sig. (2-tailed) | 0.343 | 0.128 | 0.000 | 0.127 | 0.000 |  | 0.125 | 0.228 | 0.039 | 0.899 | 0.415 | 0.166 | 0.503 | 0.068 |
| N | 34 | 30 | 34 | 34 | 34 | 34 | 33 | 32 | 32 | 34 | 34 | 34 | 34 | 34 |
| CRP | Correlation Coefficient | -0.009 | -0.151 | -.388* | -.436* | -0.046 | -0.272 | 1.000 | .631** | 0.273 | 0.072 | 0.225 | -0.007 | 0.250 | 0.019 |
| Sig. (2-tailed) | 0.956 | 0.387 | 0.025 | 0.011 | 0.797 | 0.125 |  | 0.000 | 0.102 | 0.663 | 0.168 | 0.968 | 0.125 | 0.909 |
| N | 39 | 35 | 33 | 33 | 33 | 33 | 39 | 38 | 37 | 39 | 39 | 39 | 39 | 39 |
| Fibrinogen | Correlation Coefficient | -0.047 | -0.110 | -.382* | -.410* | -0.107 | -0.219 | .631** | 1.000 | 0.131 | 0.210 | .372* | 0.090 | 0.010 | 0.168 |
| Sig. (2-tailed) | 0.780 | 0.535 | 0.031 | 0.020 | 0.562 | 0.228 | 0.000 |  | 0.447 | 0.205 | 0.021 | 0.590 | 0.953 | 0.314 |
| N | 38 | 34 | 32 | 32 | 32 | 32 | 38 | 38 | 36 | 38 | 38 | 38 | 38 | 38 |
| CAT | Correlation Coefficient | -0.142 | -0.176 | -.419* | -.483** | -0.091 | -.366* | 0.273 | 0.131 | 1.000 | 0.203 | 0.275 | 0.133 | .350* | .390* |
| Sig. (2-tailed) | 0.394 | 0.312 | 0.017 | 0.005 | 0.619 | 0.039 | 0.102 | 0.447 |  | 0.222 | 0.095 | 0.426 | 0.031 | 0.015 |
| N | 38 | 35 | 32 | 32 | 32 | 32 | 37 | 36 | 38 | 38 | 38 | 38 | 38 | 38 |
| hsa-miR-92b-3p | Correlation Coefficient | 0.221 | -0.167 | -0.274 | -.419* | -0.014 | -0.023 | 0.072 | 0.210 | 0.203 | 1.000 | .373* | 0.185 | 0.222 | .406** |
| Sig. (2-tailed) | 0.170 | 0.331 | 0.117 | 0.014 | 0.936 | 0.899 | 0.663 | 0.205 | 0.222 |  | 0.018 | 0.252 | 0.168 | 0.009 |
| N | 40 | 36 | 34 | 34 | 34 | 34 | 39 | 38 | 38 | 40 | 40 | 40 | 40 | 40 |
| hsa-miR-223-3p | Correlation Coefficient | -0.140 | -0.239 | -.359* | -.437** | -0.084 | -0.144 | 0.225 | .372* | 0.275 | .373* | 1.000 | .647** | .375* | .556** |
| Sig. (2-tailed) | 0.389 | 0.160 | 0.037 | 0.010 | 0.637 | 0.415 | 0.168 | 0.021 | 0.095 | 0.018 |  | 0.000 | 0.017 | 0.000 |
| N | 40 | 36 | 34 | 34 | 34 | 34 | 39 | 38 | 38 | 40 | 40 | 40 | 40 | 40 |
| hsa-miR-374a-5p | Correlation Coefficient | 0.000 | -0.066 | -.351* | -0.233 | -0.189 | -0.243 | -0.007 | 0.090 | 0.133 | 0.185 | .647** | 1.000 | 0.177 | .400* |
| Sig. (2-tailed) | 0.998 | 0.701 | 0.042 | 0.184 | 0.283 | 0.166 | 0.968 | 0.590 | 0.426 | 0.252 | 0.000 |  | 0.274 | 0.011 |
| N | 40 | 36 | 34 | 34 | 34 | 34 | 39 | 38 | 38 | 40 | 40 | 40 | 40 | 40 |
| hsa-miR-106b-3p | Correlation Coefficient | -0.256 | -.341* | -0.162 | -0.174 | -0.038 | -0.119 | 0.250 | 0.010 | .350* | 0.222 | .375* | 0.177 | 1.000 | 0.310 |
| Sig. (2-tailed) | 0.110 | 0.042 | 0.359 | 0.326 | 0.830 | 0.503 | 0.125 | 0.953 | 0.031 | 0.168 | 0.017 | 0.274 |  | 0.051 |
| N | 40 | 36 | 34 | 34 | 34 | 34 | 39 | 38 | 38 | 40 | 40 | 40 | 40 | 40 |
| hsa-miR-34a-5p | Correlation Coefficient | -0.281 | -0.296 | -.369* | -0.227 | -0.325 | -0.317 | 0.019 | 0.168 | .390* | .406** | .556** | .400* | 0.310 | 1.000 |
| Sig. (2-tailed) | 0.079 | 0.080 | 0.032 | 0.197 | 0.061 | 0.068 | 0.909 | 0.314 | 0.015 | 0.009 | 0.000 | 0.011 | 0.051 |  |
| N | 40 | 36 | 34 | 34 | 34 | 34 | 39 | 38 | 38 | 40 | 40 | 40 | 40 | 40 |

**Notes**: Spearman rank correlation; *P<0.05

Table S2. Correlation analysis between clinical characteristics and identified significantly dysregulated miRNAs for severe/very severe GOLD COPD participants compared to moderate GOLD COPD participants

|  | | Age | Pack years | FEV1 | FVC | FEV1/FVC | CRP | Fibrinogen | CAT | hsa-miR-374b-5p |
| --- | --- | --- | --- | --- | --- | --- | --- | --- | --- | --- |
| Age | Correlation Coefficient | 1.000 | .454* | -0.058 | -0.042 | 0.069 | 0.022 | -0.089 | 0.049 | -0.085 |
| Sig. (2-tailed) |  | 0.018 | 0.758 | 0.821 | 0.714 | 0.907 | 0.648 | 0.802 | 0.651 |
| N | 31 | 27 | 31 | 31 | 31 | 30 | 29 | 29 | 31 |
| Pack years | Correlation Coefficient | .454* | 1.000 | .422* | 0.334 | 0.290 | -0.057 | -0.053 | -0.180 | -0.133 |
| Sig. (2-tailed) | 0.018 |  | 0.028 | 0.089 | 0.142 | 0.783 | 0.800 | 0.378 | 0.509 |
| N | 27 | 27 | 27 | 27 | 27 | 26 | 25 | 26 | 27 |
| FEV1 | Correlation Coefficient | -0.058 | .422* | 1.000 | .641** | .674** | -0.352 | -.498** | -0.321 | -.401* |
| Sig. (2-tailed) | 0.758 | 0.028 |  | 0.000 | 0.000 | 0.057 | 0.006 | 0.089 | 0.026 |
| N | 31 | 27 | 31 | 31 | 31 | 30 | 29 | 29 | 31 |
| FVC | Correlation Coefficient | -0.042 | 0.334 | .641** | 1.000 | -0.060 | -.451* | -.436* | -.477** | -0.249 |
| Sig. (2-tailed) | 0.821 | 0.089 | 0.000 |  | 0.750 | 0.012 | 0.018 | 0.009 | 0.176 |
| N | 31 | 27 | 31 | 31 | 31 | 30 | 29 | 29 | 31 |
| FEV1/FVC | Correlation Coefficient | 0.069 | 0.290 | .674** | -0.060 | 1.000 | 0.070 | -0.206 | 0.101 | -0.352 |
| Sig. (2-tailed) | 0.714 | 0.142 | 0.000 | 0.750 |  | 0.715 | 0.285 | 0.603 | 0.052 |
| N | 31 | 27 | 31 | 31 | 31 | 30 | 29 | 29 | 31 |
| CRP | Correlation Coefficient | 0.022 | -0.057 | -0.352 | -.451* | 0.070 | 1.000 | .690** | 0.188 | -0.023 |
| Sig. (2-tailed) | 0.907 | 0.783 | 0.057 | 0.012 | 0.715 |  | 0.000 | 0.339 | 0.905 |
| N | 30 | 26 | 30 | 30 | 30 | 30 | 29 | 28 | 30 |
| Fibrinogen | Correlation Coefficient | -0.089 | -0.053 | -.498** | -.436* | -0.206 | .690** | 1.000 | 0.151 | 0.188 |
| Sig. (2-tailed) | 0.648 | 0.800 | 0.006 | 0.018 | 0.285 | 0.000 |  | 0.451 | 0.330 |
| N | 29 | 25 | 29 | 29 | 29 | 29 | 29 | 27 | 29 |
| CAT | Correlation Coefficient | 0.049 | -0.180 | -0.321 | -.477** | 0.101 | 0.188 | 0.151 | 1.000 | 0.352 |
| Sig. (2-tailed) | 0.802 | 0.378 | 0.089 | 0.009 | 0.603 | 0.339 | 0.451 |  | 0.061 |
| N | 29 | 26 | 29 | 29 | 29 | 28 | 27 | 29 | 29 |
| hsa-miR-374b-5p | Correlation Coefficient | -0.085 | -0.133 | -.401* | -0.249 | -0.352 | -0.023 | 0.188 | 0.352 | 1.000 |
| Sig. (2-tailed) | 0.651 | 0.509 | 0.026 | 0.176 | 0.052 | 0.905 | 0.330 | 0.061 |  |
| N | 31 | 27 | 31 | 31 | 31 | 30 | 29 | 29 | 31 |

**Notes:** Spearman rank correlation; *P<0.05

**Table S3**. Significantly dysregulated miRNAs between COPD exacerbation and stable state participants, as well as moderate and severe/very severe GOLD stages and association with clinical characteristics, including gender and smoking history

| **Gender: Grouping Variable; Male= 0, Female =1** | | | | | | |
| --- | --- | --- | --- | --- | --- | --- |
|  | hsa-miR-92b-3p | hsa-miR-223-3p | hsa-miR-374a-5p | hsa-106b-3p | hsa-miR-34a-5p | hsa-miR-374b-5p |
| Mann-Whitney U | 130.500 | 123.500 | 187.000 | 137.000 | 175.500 | 95.000 |
| Wilcoxon W | 361.500 | 354.500 | 418.000 | 368.000 | 406.500 | 248.000 |
| Z | -1.869 | -2.059 | -0.339 | -1.693 | -0.650 | -0.953 |
| Significance (p-value) | 0.062 | 0.040 | 0.735 | 0.091 | 0.516 | 0.341 |
| **Smoking history: Grouping Variable; Former smoker = 0, Current smoker =1** | | | | | | |
| Mann-Whitney U | 81.000 | 118.500 | 132.500 | 125.000 | 124.500 | 49.000 |
| Wilcoxon W | 136.000 | 173.500 | 510.500 | 503.000 | 502.500 | 77.000 |
| Z | -1.847 | -0.564 | -0.086 | -0.342 | -0.359 | -1.300 |
| Significance (p-value) | 0.065 | 0.573 | 0.932 | 0.732 | 0.720 | 0.194 |

**Notes:** Mann-Whitney U test

**Geneglobe report** –Exacerbation participants vs. Stable state participants.

**Geneglobe report** – GOLD stage 2 vs. GOLD stage 3/4.

## 
